# Supplementary material for: Harmonization in atmospheric dispersion modelling approaches to assess toxic consequences in the neighbourhood of industrial facilities
Source: Preprints.org preprint supplement (doi:10.20944/preprints202309.1669.v1), 2023-09-25
Supplement: Supplementary file 4 [file Response_reviewer_3 - MDPI_Lacome_2553135_round_1_.docx]

Response to Reviewer 3 Comments

The present work "Harmonization in atmospheric dispersion modelling approaches to assess toxic consequences in the neighbourhood of industrial facilities " represent an interest research in the context of citizens' protection against industrial hazards .

Some remarks

**Point 1:**

1. In the Section Context of AT&D Model uses some references and literature data are required.

**Response 1:**

From the authors' point of view, there is very little discussion regarding the context of uses. However, a reference has been added.

**Point 2:**

2. The text inserted in Figure 1 is unclear. Use a higher size for the words.

**Response 2:**

Thank you for your remark; higher size has been used.

**Point3:**

3. insert equation numbers.

**Response 3:**

Equation numbers have ben inserted.

**Point4:**

4. Figure 3 is unclear.

**Response 4:**

Figure 3 has been clarified.

**Point5:**

5. The atmospheric conditions were evaluated for which period?

**Response 5:**

The atmospheric conditions were evaluated over first 5 mins of the release.

**Point6:**

6. Some "see Error! Reference source not found.' are appeared in text. Corrected all.

**Response 5:**

All these errors have been corrected.

**Point7:**

7. put standard errors where is necessary.

**Response 7:**

No standard errors regarding input data have been estimated.

**Point8:**

8. Authors stated that "This study should be considered as an essential stage for validate the use of CFD model in the context of regulatory studies where the need of assess obstructed environment will be of primary importance. " Give a explanation.

**Response 8:**

The authors deem that the validation of a model by comparison with experimental data should be a generic rule for practice harmonization in the context of regulatory studies.

**Point9:**

9. In the introduction part must be pointed the novelty of this study.

**Response 9:**

Thank you for this remark.

Some comments have been added in section 1.3

See section 1.3

“From the authors' perspective, this subject is very rarely addressed in the scientific literature. This work represents a new approach to thinking about and illustrating data harmonisation for models.”

**Point10:**

10. in conclusion part "In this study" was repeated. Reformulated.

**Response 10:**

Sentences have been reformulated.
